# Supplementary figures and images for: The Functional Influences of Common ABCB1 Genetic Variants on the Inhibition of P-glycoprotein by Antrodia cinnamomea Extracts
Source: PubMed Central journal article supplement (PMC3934917; doi:10.1371/journal.pone.0089622), 2014-02-25

Supplement Figure S1.

(A)

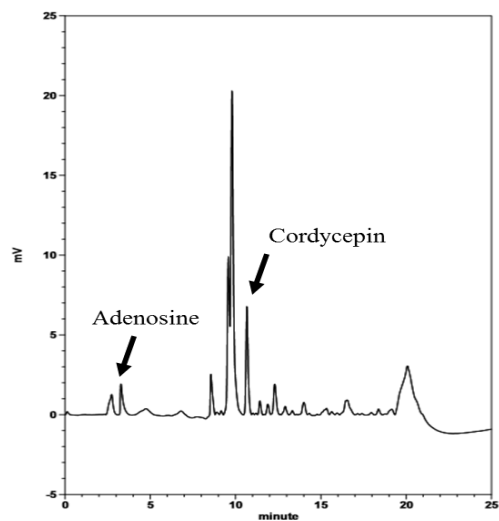

(B)

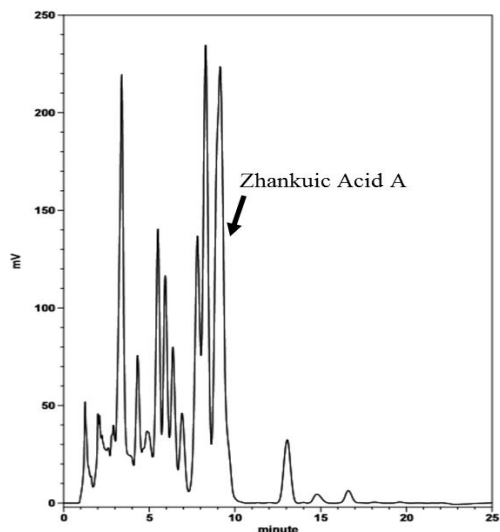

(C)

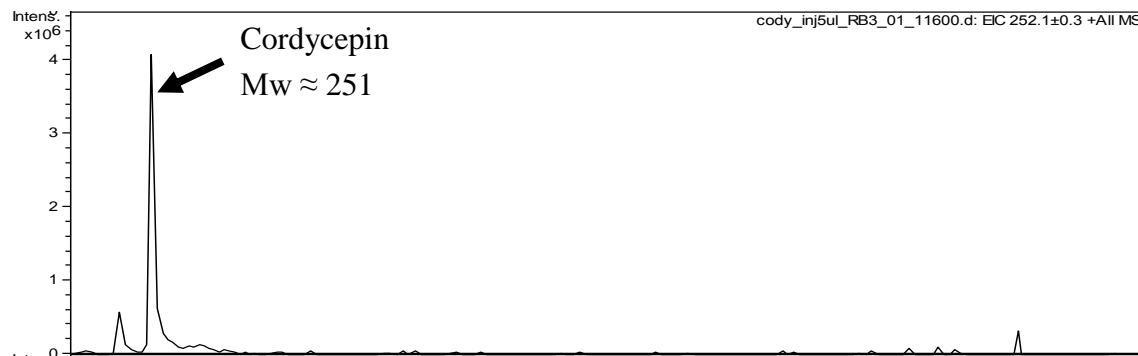

(D)

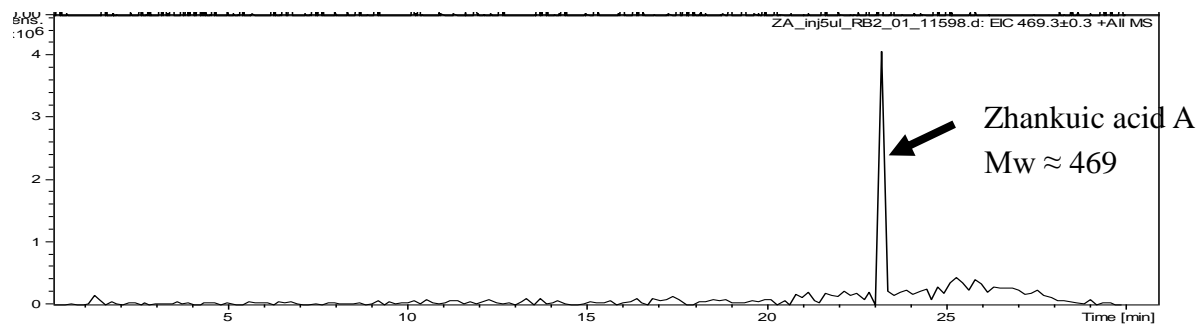

(E)

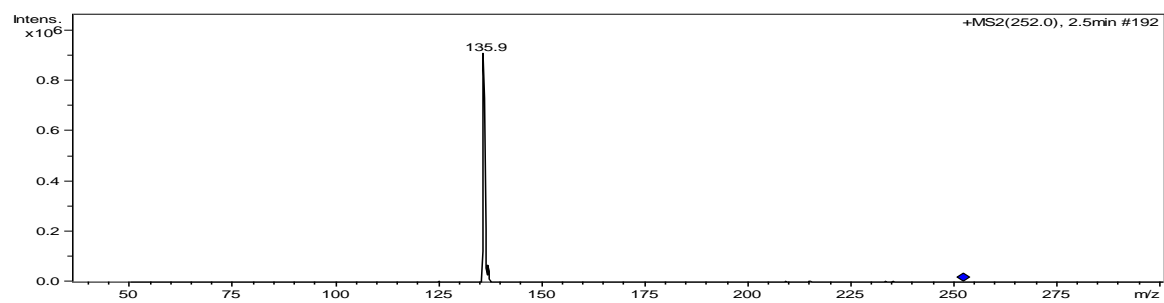

(F)

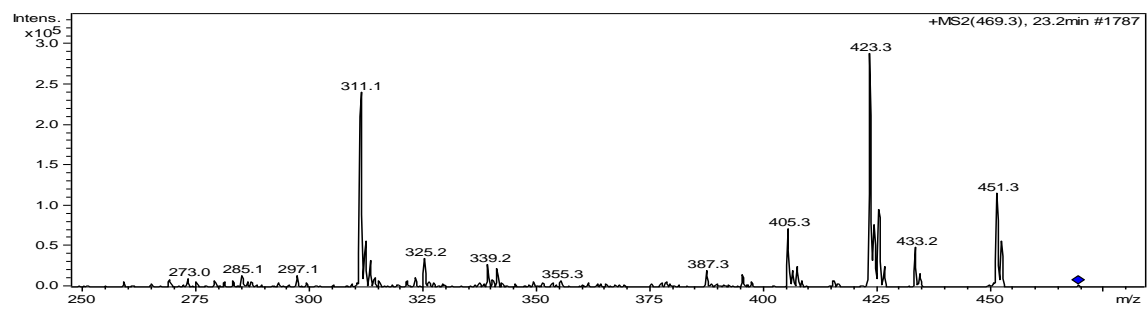

Supplement: pone.0089622.s001.pdf [file pone.0089622.s001.pdf]
